# Supplementary material for: Phosphodiesterase 9A Inhibition Facilitates Corticostriatal Transmission in Wild-Type and Transgenic Rats That Model Huntington’s Disease
Source: PubMed Central journal article supplement (PMC7283904; doi:10.3389/fnins.2020.00466), 2020-06-03
Supplement: Table_1.pdf [file Table_1.pdf]

**Supplemental Table 1.** Comparison of spike properties of unidentified MSNs and identified SNr+ MSNs across genotypes.

|                             | <b>Group</b>       | <b>Firing rate (Hz)</b> | <b>Spike duration (ms)</b> | <b>Antidromic spike threshold (<math>\mu</math>A)</b> | <b>Antidromic spike latency (ms)</b> |
|-----------------------------|--------------------|-------------------------|----------------------------|-------------------------------------------------------|--------------------------------------|
| <b>Unidentified MSNs</b>    | WT-veh (29 cells)  | $0.0051 \pm 0.003$      | $1.28 \pm 0.026$           | na                                                    | na                                   |
|                             | TG5-veh (32 cells) | $0.0814 \pm 0.052$      | $1.37 \pm 0.033$           | na                                                    | na                                   |
| <b>Identified SNr+ MSNs</b> | WT-veh (17 cells)  | $0.0000 \pm 0.000$      | $1.33 \pm 0.046$           | $858 \pm 111$                                         | $9.9 + 0.9$                          |
|                             | TG5-veh (14 cells) | $0.0020 \pm 0.002$      | $1.32 \pm 0.061$           | $634 \pm 92$                                          | $9.4 + 0.9$                          |

Data are presented as mean  $\pm$  SEM. Data were analyzed using one-way ANOVA (all MSNs) and t-test (SNr+ MSNs).  $p > 0.05$  for all comparisons. Abbreviations: MSN, medium-sized spiny neuron; TG5, BAC transgenic HD rats; veh, vehicle; WT, wild-type rats.
