# Supplementary material for: Phosphodiesterase 9A Inhibition Facilitates Corticostriatal Transmission in Wild-Type and Transgenic Rats That Model Huntington’s Disease
Source: PubMed Central journal article supplement (PMC7283904; doi:10.3389/fnins.2020.00466), 2020-06-03
Supplement: Table_2.pdf [file Table_2.pdf]

**Supplemental Table 2.** Comparison of spontaneous firing activity of striatal MSNs and FSIs across genotypes and drug treatments.

|                                                | <b>Group</b>          | <b>Firing rate (Hz)</b> | <b>Spike duration (ms)</b> | <b>% cells firing</b> |
|------------------------------------------------|-----------------------|-------------------------|----------------------------|-----------------------|
| <b>Spontaneously active and quiescent MSNs</b> | WT-veh (46 cells)     | 0.0031 ± 0.002          | 1.30 ± 0.024               | 7.3%                  |
|                                                | TG5-veh (46 cells)    | 0.058 ± 0.052           | 1.35 ± 0.030               | 10.8%                 |
|                                                | WT-PDE9Ai (51 cells)  | 0.012 ± 0.006           | 1.37 ± 0.025               | 13.7%                 |
|                                                | TG5-PDE9Ai (27 cells) | 0.057 ± 0.045           | 1.32 ± 0.026               | 14.8%                 |
| <b>Spontaneously active and quiescent FSIs</b> | WT-veh (7 cells)      | 4.25 ± 2.88             | 0.89 ± 0.064               | 71.4%                 |
|                                                | TG5-veh (6 cells)     | 7.74 ± 7.74             | 0.86 ± 0.033               | 20.0%                 |

Data are presented as mean ± SEM. Data were analyzed using Two-way ANOVA (MSNs) and t-test (FSIs).  $p > 0.05$  for all comparisons. Abbreviations: FSI, fast-spiking interneuron; MSN, medium-sized spiny neuron; PDE9Ai, phosphodiesterase 9A inhibitor (PF-04447943), TG5, BAC transgenic HD rats; veh, vehicle; WT, wild-type rats.
